# Supplementary material
Source: PubMed Central journal article supplement (PMC11028219)
Supplement: 262_2018_2282_MOESM1_ESM.pdf [file 262_2018_2282_MOESM1_ESM.pdf]

# Supplemental Figure 1.

## a. secPD-L1 amino acid sequence

MRIFAVFIFMTYWHELLNAFTVTVPKDLYVVEYGSNMTIECKFPVEKQLDLAALIVYWEMEDKNIIQFVHGEECLKVQHSSYRQ  
 RARLLKDQLSLGNAALQITDVKLQDAGVYRCMISYGGADYKRITVKVNAPYNKINQRILVVDVPTSEHELTCQAEGYPKAEVIW  
 TSSDHQVLSGKTTTTNSKREEKLFNVTSTLRINTTTNEIFYCTFRRLDPEENHTAELVIP**GNILNVSIKICLTLPST**.

## Full length PD-L1 amino acid sequence

MRIFAVFIFMTYWHELLNAFTVTVPKDLYVVEYGSNMTIECKFPVEKQLDLAALIVYWEMEDKNIIQFVHGEECLKVQHSSYRQ  
 RARLLKDQLSLGNAALQITDVKLQDAGVYRCMISYGGADYKRITVKVNAPYNKINQRILVVDVPTSEHELTCQAEGYPKAEVIW  
 TSSDHQVLSGKTTTTNSKREEKLFNVTSTLRINTTTNEIFYCTFRRLDPEENHTAELV**PELPLAHPNERTHLVILGAILLCLGVAL**  
**TFIFRLRKGRMMMDVKKCGIQDTNSKKQSDTHLEET**.

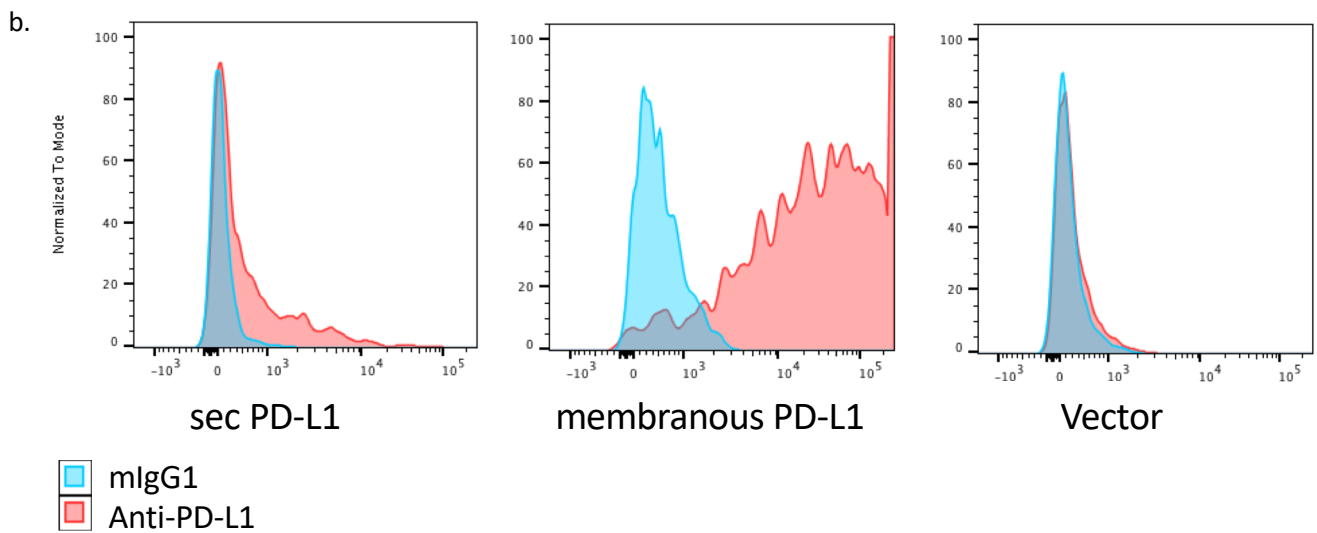

## c.

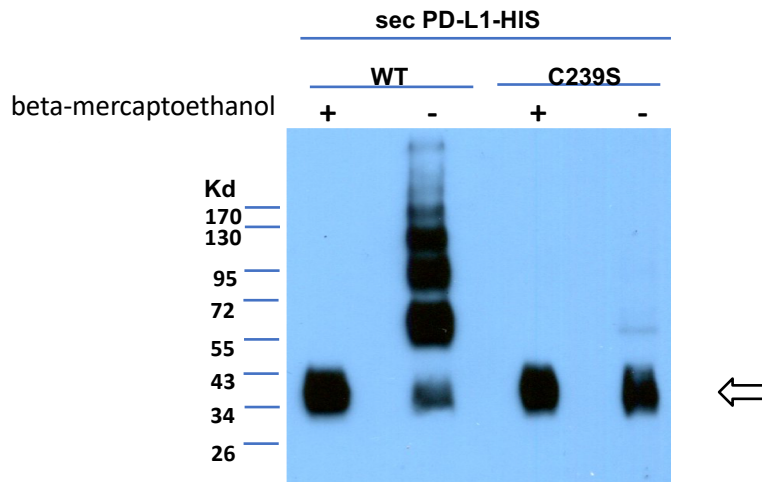

d. PCR schema

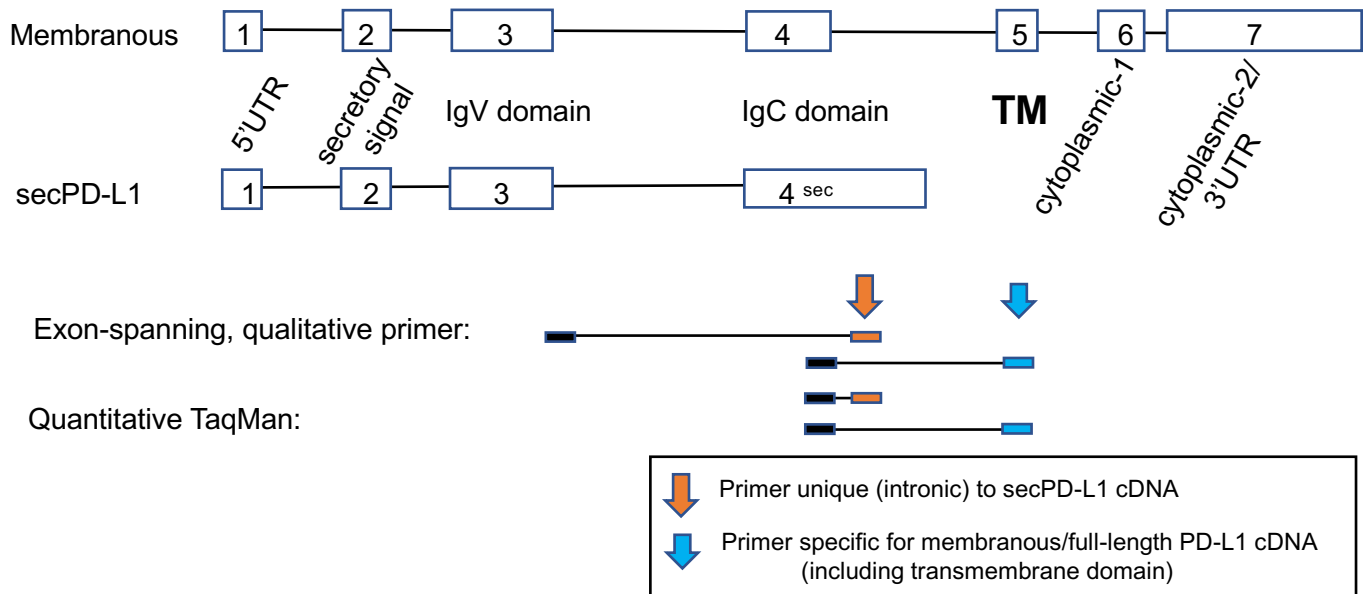

e. Exon-spanning, qualitative primer  
PCR products (>300bp):

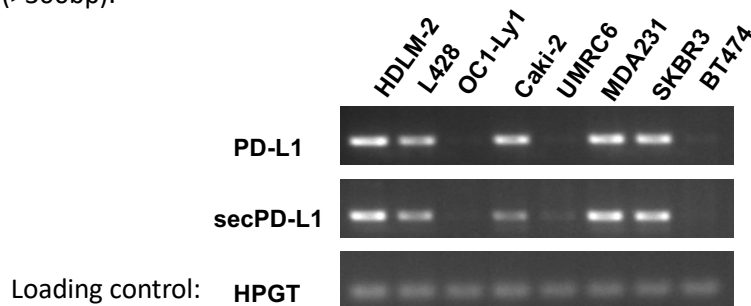

Supplemental Figure 1. (a) SecPD-L1 and full-length PD-L1 are distinguishable by qRT-PCR. SecPD-L1 and full-length PD-L1 share 227 amino acids but secPD-L1 has an 18 amino acid tail different from the full-length protein. (b) Flow cytometry of 293T transfected with vector, secPD-L1, or full-length PD-L1 (blue isotype control; red PD-L1 antibody (clone 339.6A2)). (c) Western blot analysis of recombinant secPD-L1 and secPD-L1 with mutation of the cysteine 239 within the C-terminus, in reducing and non-reducing conditions (open arrow indicating monomeric PD-L1 and closed arrow indicating dimeric secPD-L1 protein). (d) Semiquantitative (exon-exon spanning) and (e) quantitative PCR schema to distinguish the 207 base pairs at the 3' end of the mRNA unique to the secPD-L1 transcript and 804 base pairs at the 3' end of full-length PD-L1 mRNA. Full-length PD-L1 expression relative to secPD-L1 RNA expression by qRT-PCR of cancer cell lines in figure 2a.

## Supplemental Figure 2.

### a. RNASeq schema

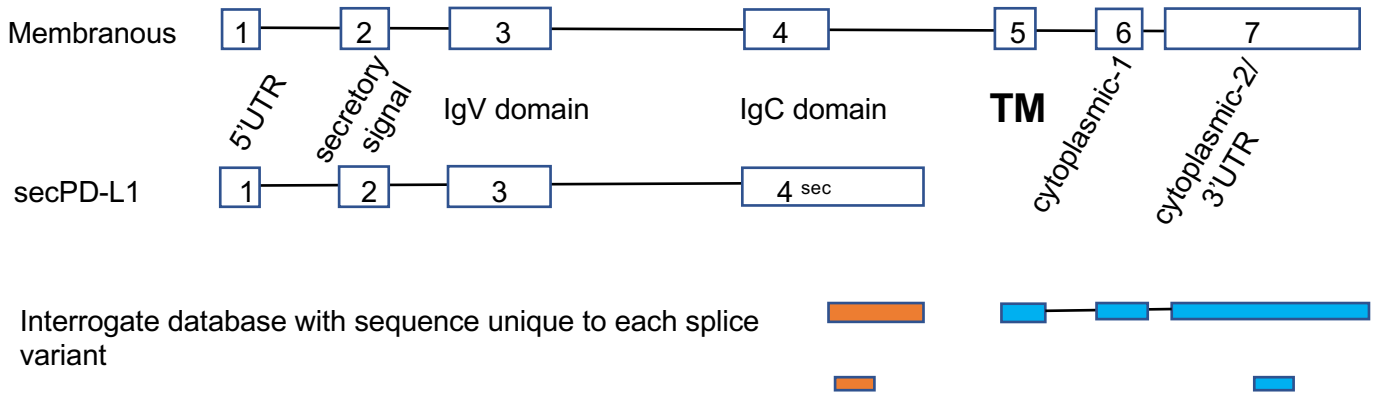

### b.

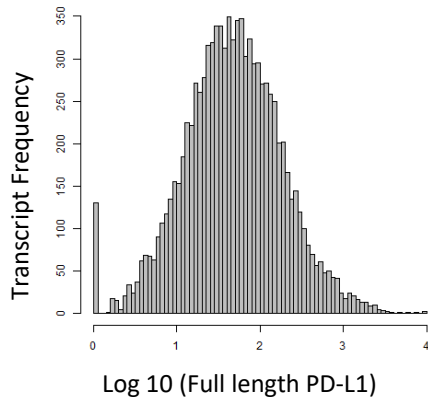

### c.

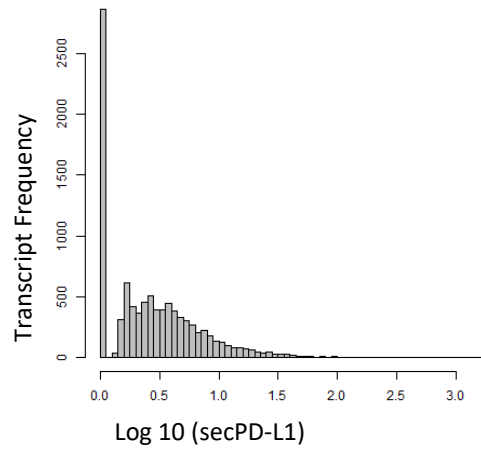

### d. Ipilimumab treated melanoma

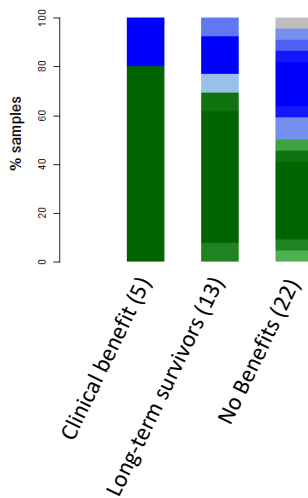

### e. anti-PD-1 treated melanoma

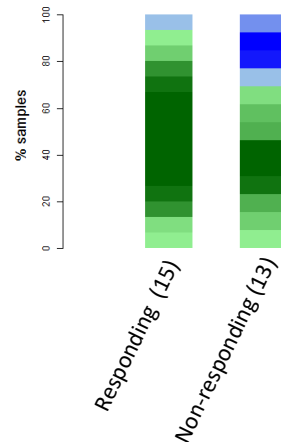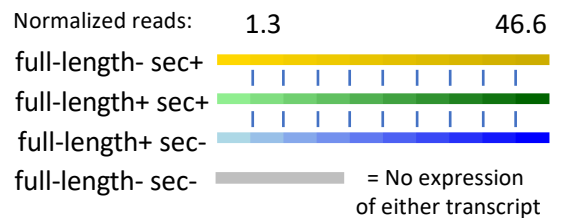

Supplemental Figure 2. SecPD-L1 and full-length PD-L1 expression are interrogatable by RNASeq analysis. (a) Transcriptomic strategy to distinguish the unique 3' end of the secPD-L1 from the 3' end of the full-length PD-L1 in RNASeq. (b-c) Frequency of tumors and amount of full-length PD-L1 or secPD-L1 expression in all tumors in TCGA. (d-e) Nearly all melanoma specimens from patients treated with CTLA-4 blockade or PD-1 blockade (nivolumab or pembrolizumab) expressed full-length PD-L1 and the majority express secPD-L1.

## Supplemental Figure 3.

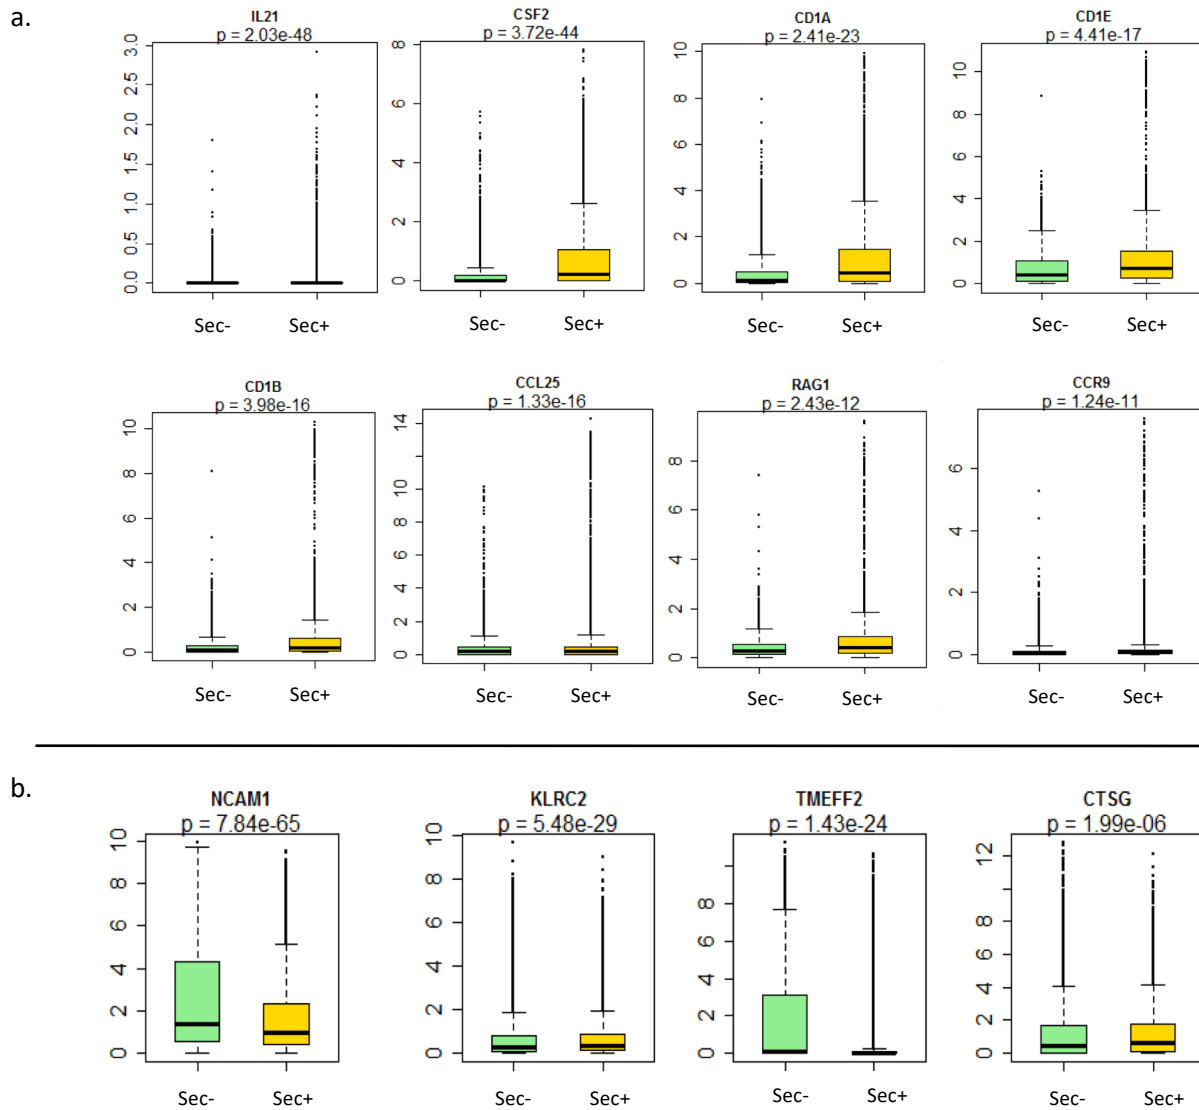

Supplemental Figure 3. Gene Set Enrichment Analysis (GEAS) shows differences in sec-expressing and no-sec-expressing cohorts of TCGA. **(a)** Within the 805 immune-related genes in the differential gene analysis, eleven transcripts are enriched in sec-expressing cohort: CD274/PD-L1, IFN $\gamma$  and S100A8 (in Figure 4b), and IL21, CSF2, CD1A, CD1E, CD1B, CCL25, RAG1, CCR9; **(b)** while only four immune-related transcripts are enriched in no-sec-expressing cohort of TCGA: CTSG, KLRC2, NCAM1, TMEFF2.
